# Supplementary material
Source: MDPI journal article supplement (https://www.mdpi.com/2073-4395/12/8/1939)
Supplement: s1 [file s1]

**Table S1.** Analysis of variance for grain yield. Abbreviations: df – degree of freedom.

| Source of variation | df | Sum of Sq | Wald statistic Pr (Chisq) |
|---------------------|----|-----------|---------------------------|
| (Intercept)         | 2  | 30803.7   | 27819.3 < 2.2e-16 ***     |
| Location (Loc)      | 2  | 536.86    | 484.95 < 2.2e-16 ***      |
| Tester (T)          | 1  | 269.85    | 243.75 < 2.2e-16 ***      |
| Landrace (Lan)      | 36 | 513.45    | 463.65 < 2.2e-16 ***      |
| Loc:Rep             | 2  | 2.1       | 1.8 0.53537               |
| Loc:T               | 2  | 0.3       | 0.3 0.66503               |
| Loc:Lan             | 72 | 99.15     | 89.55 0.007782 **         |
| T:Lan               | 36 | 174.15    | 157.2 1.2e-08 ***         |
| Loc:T:Lan           | 72 | 63.9      | 57.75 0.358887            |
| Residual (MS)       |    | 1.1       |                           |
