# Supplementary material
Source: MDPI journal article supplement (https://www.mdpi.com/2073-4395/12/8/1939)
Supplement: s1 [file s1]

**Table S2.** Significance of differences in effect of landraces on grain yield at crossings with both testers. Abbreviations: GD – genotype designation; GY – grain yield (t ha<sup>-1</sup>).

| GD  | Rank | GY                  | GD  | Rank | GY                   | GD  | Rank | GY                   |
|-----|------|---------------------|-----|------|----------------------|-----|------|----------------------|
| G35 | 1    | 8.91 <sup>a</sup>   | G2  | 14   | 7.37 <sup>cdef</sup> | G5  | 27   | 6.34 <sup>fghi</sup> |
| G13 | 2    | 8.49 <sup>ab</sup>  | G30 | 15   | 7.26 <sup>cdef</sup> | G10 | 28   | 6.33 <sup>fghi</sup> |
| G26 | 3    | 8.19 <sup>abc</sup> | G15 | 16   | 7.24 <sup>cdef</sup> | G18 | 29   | 6.32 <sup>fghi</sup> |
| G34 | 4    | 8.12 <sup>abc</sup> | G16 | 17   | 7.08 <sup>defg</sup> | G3  | 30   | 6.19 <sup>ghi</sup>  |
| G27 | 5    | 7.92 <sup>bcd</sup> | G6  | 18   | 7.05 <sup>defg</sup> | G1  | 31   | 6.06 <sup>ghi</sup>  |
| G23 | 6    | 7.85 <sup>bcd</sup> | G17 | 19   | 7.03 <sup>defg</sup> | G9  | 32   | 6.05 <sup>ghi</sup>  |
| G11 | 7    | 7.76 <sup>bcd</sup> | G7  | 20   | 6.89 <sup>efg</sup>  | G19 | 33   | 5.94 <sup>hi</sup>   |
| G29 | 8    | 7.60 <sup>bcd</sup> | G4  | 21   | 6.79 <sup>efgh</sup> | G31 | 34   | 5.89 <sup>hi</sup>   |
| G24 | 9    | 7.55 <sup>cde</sup> | G25 | 22   | 6.75 <sup>efgh</sup> | G8  | 35   | 5.67 <sup>ij</sup>   |
| G14 | 10   | 7.50 <sup>cde</sup> | G12 | 23   | 6.72 <sup>efgh</sup> | G32 | 36   | 4.96 <sup>ik</sup>   |
| G37 | 11   | 7.47 <sup>cde</sup> | G22 | 24   | 6.70 <sup>efgh</sup> | G21 | 37   | 4.80 <sup>k</sup>    |
| G33 | 12   | 7.47 <sup>cde</sup> | G20 | 25   | 6.53 <sup>fghi</sup> |     |      |                      |
| G36 | 13   | 7.46 <sup>cde</sup> | G28 | 26   | 6.50 <sup>fghi</sup> |     |      |                      |
