# Supplementary material
Source: MDPI journal article supplement (https://www.mdpi.com/2073-4395/12/8/1939)

### P values after LSD test

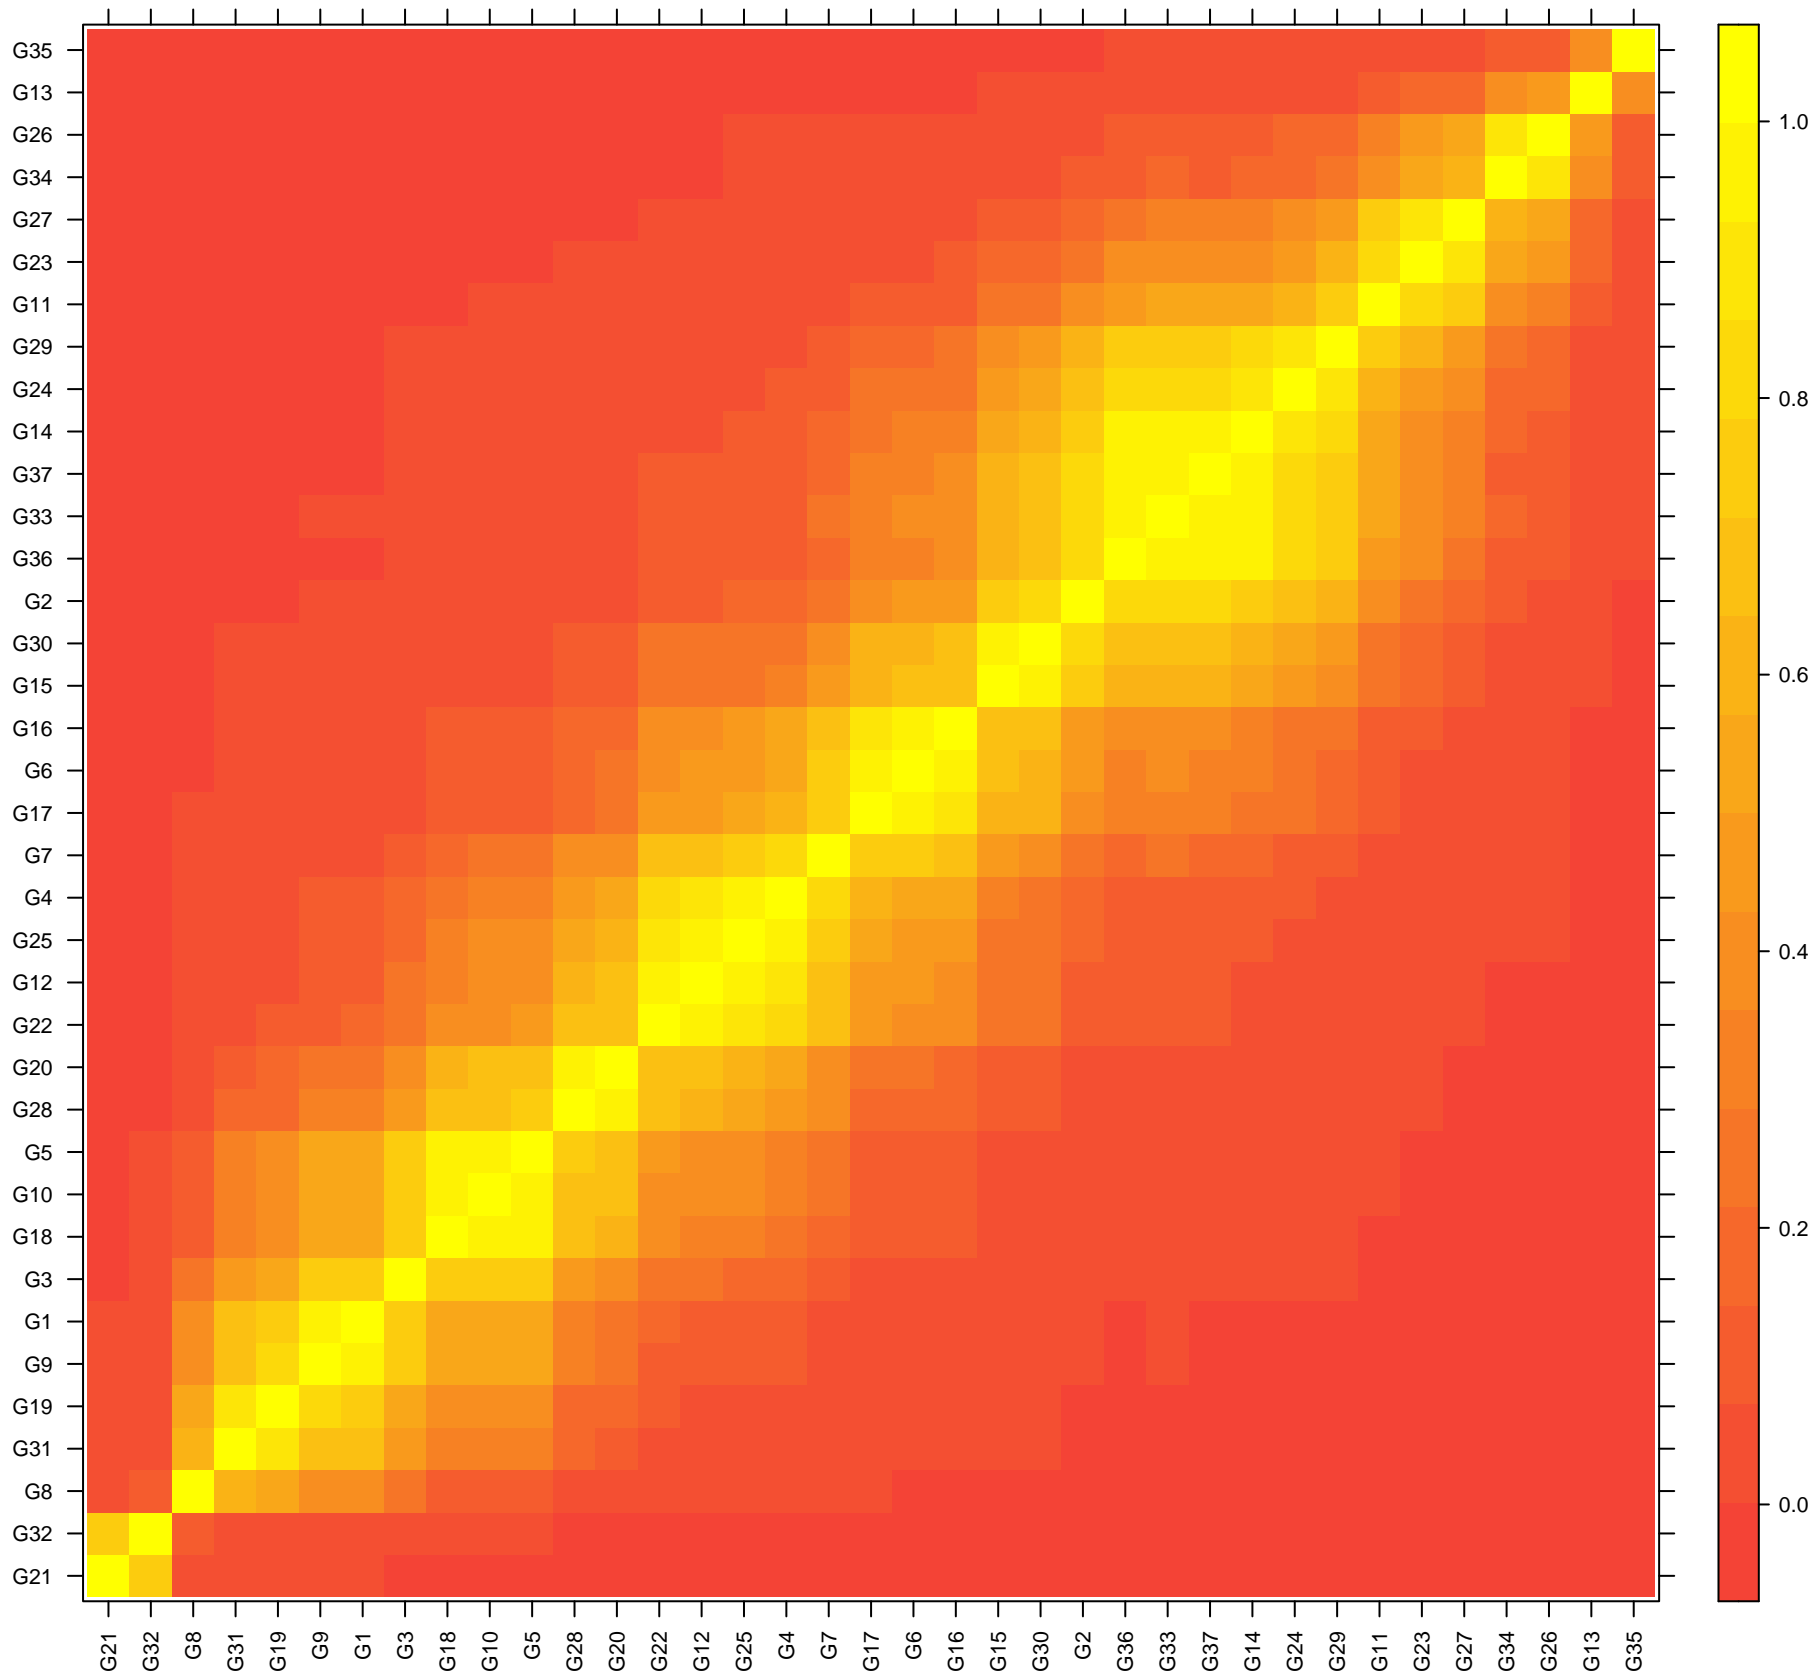

Supplement: s1 [file s1]
